# Supplementary material for: Effects of 2010–2045 climate change on ozone levels in China under carbon neutrality scenario: Key meteorological parameters and processes
Source: Copernicus journal article supplement (doi:10.5194/egusphere-2024-3470), 2024-11-14
Supplement: Supplementary file 1 [file egusphere-2024-3470-supplement.pdf]

## **S1. Formaldehyde nitrogen ratio (FNR)**

For discussion of ozone ( $O_3$ ) sensitivity to its precursors, the formaldehyde nitrogen ratio (FNR) (Jin and Holloway, 2015) is used to feature the  $O_3$  formation regime, with  $FNR < 1.0$  representing VOC-limited regimes,  $FNR > 2.0$  representing  $NO_x$ -limited regime, and FNR between 1.0 and 2.0 representing transitional regime. For model evaluation, monthly mean Aqua OMI tropospheric columns of nitrogen dioxide ( $NO_2$ ) (Boersma et al., 2011) and formaldehyde (HCHO) (De Smedt et al., 2015) products in 2015 are obtained from <https://www.temis.nl/airpollution/>, with resolutions of  $0.125^\circ \times 0.125^\circ$  and  $0.25^\circ \times 0.25^\circ$ , respectively. The satellite observations are interpolated into  $2^\circ \times 2.5^\circ$  resolution to be consistent with that of model outputs. Figure S6 evaluates the simulated present-day tropospheric columns of  $NO_2$  and HCHO in CpdEpd simulation by comparing with Aqua satellite observations. The tropospheric columns of  $NO_2$  and HCHO levels are overestimated by 4.4 and  $1.1 \times 10^{15}$  molec  $cm^{-2}$  in EC and by 1.8 and  $0.7 \times 10^{15}$  molec  $cm^{-2}$  nationwide, respectively. The overestimation of tropospheric columns of  $NO_2$  and HCHO can be attributed to the lower tropopause pressure in GCAP 2.0 simulations (Murray et al., 2021).

**Table S1. Information of climate models in CMIP6 used in this study.**

| Model                    | N  | Member_id (Historical/SSP1-1.9) |
|--------------------------|----|---------------------------------|
| CanESM5                  | 2  | rlilp1f1, rlilp2f1              |
| GFDL-ESM4                | 1  | rlilp1f1                        |
| GISS-E2-1-G <sup>a</sup> | 3  | rlilp1f2, rlilp3f1, rlilp5f1    |
| GISS-E2-1-H <sup>b</sup> | 2  | rlilp1f2, rlilp3f1              |
| MIROC-ES2H               | 1  | rlilp4f2                        |
| MIROC-ES2L               | 1  | rlilp1f2                        |
| Total                    | 10 |                                 |

<sup>a, b</sup> GISS-E2.1-G and GISS-E2.1-H are coupled models of the GISS-E2.1 atmospheric model with the GISS and HYCOM ocean models, respectively.

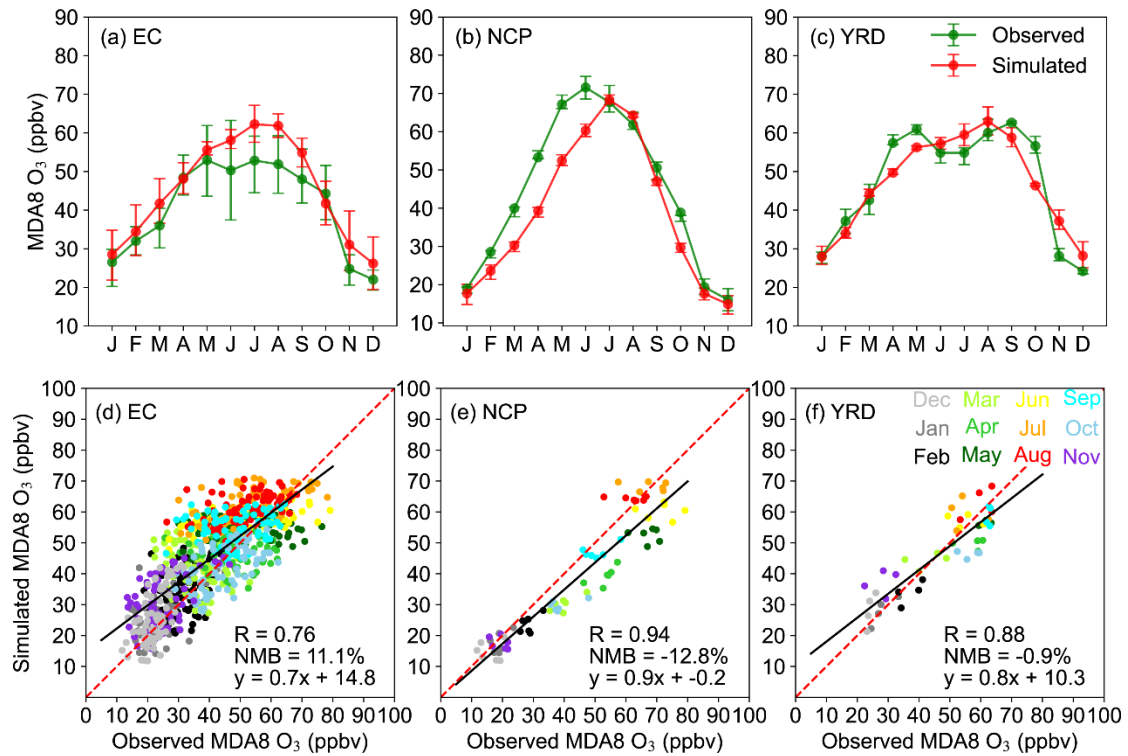

**Figure S1.** (a)-(c) Monthly variations in simulated and observed MDA8 O<sub>3</sub> concentrations (ppbv) over (a) EC (with a total of 68 grids), (b) NCP (with a total of 6 grids), and (c) YRD (with a total of 4 grids) regions. Bars represent the range from first to third quartiles of all grid samples in this region. (d)-(f) The scatterplot of simulated versus observed monthly mean MDA8 O<sub>3</sub> concentrations for grids in EC, NCP, and YRD. The linear fit (black solid line and equation), correlation coefficient (R), and normalized mean biases (NMB) that calculated for grids in these three regions are also shown when all of the year 2015 data are considered.

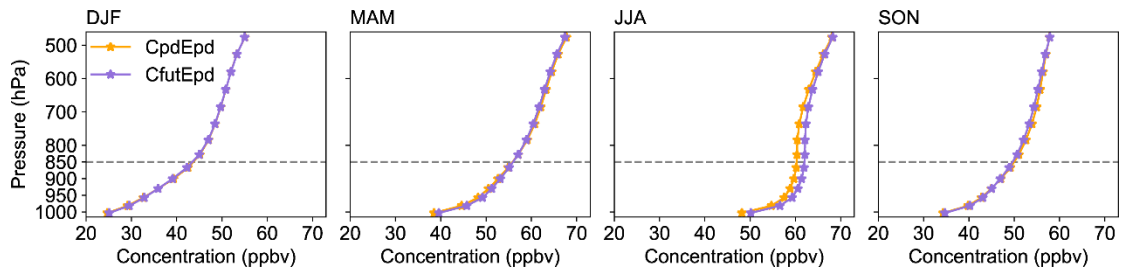

**Figure S2. Vertical profile of seasonal mean O<sub>3</sub> concentrations (ppbv) over EC in CpdEpd and CfutEpd simulations.**

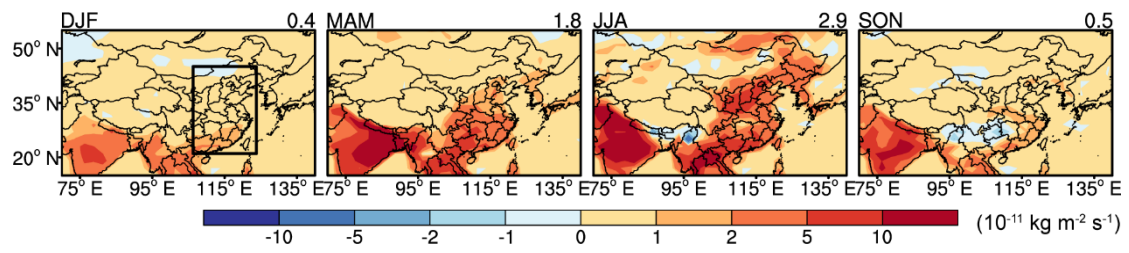

**Figure S3. Seasonal mean changes in biogenic emission rates of VOCs ( $10^{-11} \text{ kg m}^{-2} \text{ s}^{-1}$ ) due to climate change over 2010-2045. The black rectangle indicates the domain of EC, and the top right number of each panel is the regional mean value for EC.**

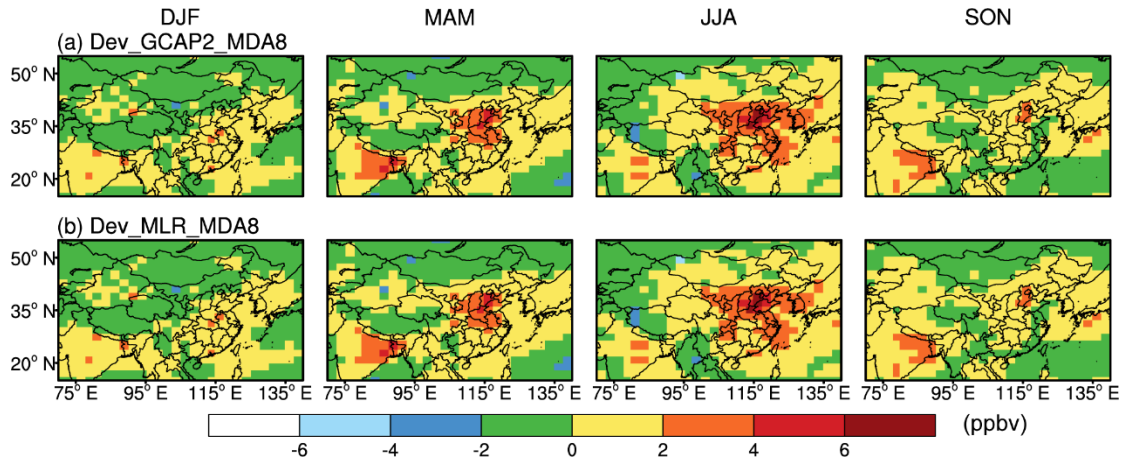

Figure S4. Comparisons of the spatial distributions of climate-induced seasonal mean MDA8 O<sub>3</sub> changes simulated by (a) GCAP 2.0 (Dev\_GCAP2\_MDA8) with those predicted by (b) stepwise MLR model (Dev\_MLR\_MDA8).

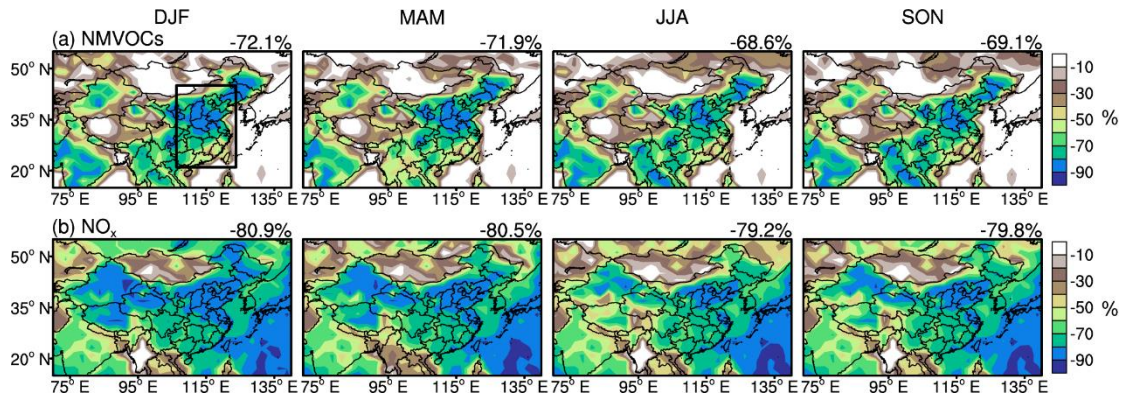

**Figure S5. Percentage changes (%) in anthropogenic emission rates of (a) NMVOCs and (b) NO<sub>x</sub> in 2050 relative to 2015 under SSP1-1.9 scenario. The black rectangle indicates the domain of EC, and the top right number of each panel is the regional mean value for EC.**

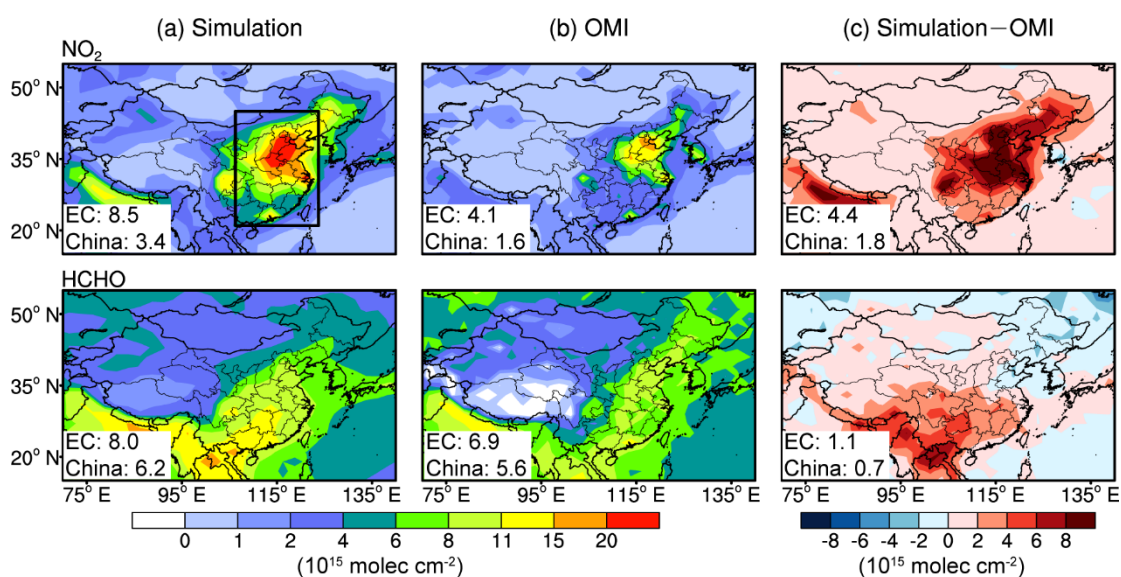

**Figure S6.** (a) Simulated and (b) OMI retrieved annual mean tropospheric columns of nitrogen dioxide ( $\text{NO}_2$ ) and formaldehyde (HCHO) ( $10^{15} \text{ molec cm}^{-2}$ ) in 2015 in China, and (c) their difference. The black rectangle indicates the domain of EC, and the regional mean values for EC and the whole country are shown in the bottom left corner of each panel.

## References

- Boersma, K. F., Eskes, H. J., Dirksen, R. J., van der A, R. J., Veefkind, J. P., Stammes, P., Huijnen, V., Kleipool, Q. L., Sneep, M., Claas, J., Leitão, J., Richter, A., Zhou, Y., and Brunner, D.: An improved tropospheric  $\text{NO}_2$  column retrieval algorithm for the Ozone Monitoring Instrument, *Atmos. Meas. Tech.*, 4, 1905-1928, <https://doi.org/10.5194/amt-4-1905-2011>, 2011.
- De Smedt, I., Stavrou, T., Hendrick, F., Danckaert, T., Vlemmix, T., Pinardi, G., Theys, N., Lerot, C., Gielen, C., Vigouroux, C., Hermans, C., Fayt, C., Veefkind, P., Müller, J. F., and Van Roozendaal, M.: Diurnal, seasonal and long-term variations of global formaldehyde columns inferred from combined OMI and GOME-2 observations, *Atmos. Chem. Phys.*, 15, 12519-12545, <https://doi.org/10.5194/acp-15-12519-2015>, 2015.
- Jin, X. and Holloway, T.: Spatial and temporal variability of ozone sensitivity over China observed from the Ozone Monitoring Instrument, *J. Geophys. Res.: Atmos.*, 120, 7229-7246, <https://doi.org/10.1002/2015jd023250>, 2015.
- Murray, L. T., Leibensperger, E. M., Orbe, C., Mickley, L. J., and Sulprizio, M.: GCAP 2.0: a global 3-D chemical-transport model framework for past, present, and future climate scenarios, *Geosci. Model Dev.*, 14, 5789-5823, <https://doi.org/10.5194/gmd-14-5789-2021>, 2021.
